# Supplementary material for: LPS-Induced Mortality in Zebrafish: Preliminary Characterisation of Common Fish Pathogens
Source: MDPI journal article supplement (doi:10.3390/microorganisms11092205), 2023-08-31
Supplement: s1 [file s1]

## SUPPLEMENTARY TABLES

**Table S1.** *p*-values of pairwise comparisons using Log-rank (Mantel-Cox) test of zebrafish survival curves when subjected to live *A. hydrophila* at the described concentrations (CFU mL<sup>-1</sup>).

|                                       | Control | 1e <sup>9</sup> CFU mL <sup>-1</sup> | 5e <sup>9</sup> CFU mL <sup>-1</sup> |
|---------------------------------------|---------|--------------------------------------|--------------------------------------|
| Control                               | -       | -                                    | -                                    |
| 1e <sup>9</sup> CFU mL <sup>-1</sup>  | >0.9999 | -                                    | -                                    |
| 5e <sup>9</sup> CFU mL <sup>-1</sup>  | 0.0205  | 0.0205                               | -                                    |
| 1e <sup>10</sup> CFU mL <sup>-1</sup> | <0.0001 | <0.0001                              | 0.0006                               |

**Table S2.** *p*-values of pairwise comparisons using Log-rank (Mantel-Cox) test of zebrafish survival curves when subjected to LPS extracted from *A. hydrophila* (LPS AH) and commercial LPS from *P. aeruginosa* (PA-Com), at the described concentrations (µg mL<sup>-1</sup>).

|                                   | Control | LPS AH 50<br>µg mL <sup>-1</sup> | LPS AH 100<br>µg mL <sup>-1</sup> | LPS AH 250<br>µg mL <sup>-1</sup> | LPS AH 500<br>µg mL <sup>-1</sup> |
|-----------------------------------|---------|----------------------------------|-----------------------------------|-----------------------------------|-----------------------------------|
| Control                           | -       | -                                | -                                 | -                                 | -                                 |
| LPS AH 50 µg mL <sup>-1</sup>     | 0.2471  | -                                | -                                 | -                                 | -                                 |
| LPS AH 100 µg mL <sup>-1</sup>    | 0.2471  | >0.9999                          | -                                 | -                                 | -                                 |
| LPS AH 250 µg mL <sup>-1</sup>    | 0.2471  | >0.9999                          | >0.9999                           | -                                 | -                                 |
| LPS AH 500 µg mL <sup>-1</sup>    | 0.0005  | 0.0005                           | 0.0005                            | 0.0005                            | -                                 |
| LPS PA-Com 45 µg mL <sup>-1</sup> | <0.0001 | <0.0001                          | <0.0001                           | <0.0001                           | <0.0001                           |

**Table S3.** *p*-values of pairwise comparisons using Log-rank (Mantel-Cox) test of zebrafish survival curves when subjected to live *V. harveyi* at the described concentrations (CFU mL<sup>-1</sup>).

|                                       | Control | 1e <sup>9</sup> CFU mL <sup>-1</sup> | 5e <sup>9</sup> CFU mL <sup>-1</sup> |
|---------------------------------------|---------|--------------------------------------|--------------------------------------|
| Control                               | -       | -                                    | -                                    |
| 1e <sup>9</sup> CFU mL <sup>-1</sup>  | <0.0001 | -                                    | -                                    |
| 5e <sup>9</sup> CFU mL <sup>-1</sup>  | <0.0001 | 0.1538                               | -                                    |
| 1e <sup>10</sup> CFU mL <sup>-1</sup> | 0.0012  | <0.0001                              | <0.0001                              |

**Table S4.** *p*-values of pairwise comparisons using Log-rank (Mantel-Cox) test of zebrafish survival curves when subjected to LPS extracted from *V. harveyi* (LPS VH) commercial LPS from *P. aeruginosa* (PA-Com), at the described concentrations (µg mL<sup>-1</sup>).

|                                      | Control | LPS VH 50<br>µg mL <sup>-1</sup> | LPS VH 100<br>µg mL <sup>-1</sup> | LPS VH 250<br>µg mL <sup>-1</sup> | LPS VH 500<br>µg mL <sup>-1</sup> |
|--------------------------------------|---------|----------------------------------|-----------------------------------|-----------------------------------|-----------------------------------|
| Control                              | -       | -                                | -                                 | -                                 | -                                 |
| LPS VH 50 µg mL <sup>-1</sup>        | 0.1563  | -                                | -                                 | -                                 | -                                 |
| LPS VH 100 µg mL <sup>-1</sup>       | 0.4131  | >0.9999                          | -                                 | -                                 | -                                 |
| LPS VH 250 µg mL <sup>-1</sup>       | 0.0062  | 0.0004                           | 0.0378                            | -                                 | -                                 |
| LPS VH 500 µg mL <sup>-1</sup>       | <0.0001 | <0.0001                          | <0.0001                           | <0.0001                           | -                                 |
| LPS PA-Com 45 µg<br>mL <sup>-1</sup> | <0.0001 | <0.0001                          | <0.0001                           | <0.0001                           | <0.0001                           |

**Table S5.** *p*-values of pairwise comparisons using Log-rank (Mantel-Cox) test of zebrafish survival curves when subjected to live *Ph. damsela* subps. piscicida at the described concentrations (CFU mL<sup>-1</sup>).

|                                      | Control | 1e <sup>7</sup> CFU mL <sup>-1</sup> | 2e <sup>7</sup> CFU mL <sup>-1</sup> |
|--------------------------------------|---------|--------------------------------------|--------------------------------------|
| Control                              | -       | -                                    | -                                    |
| 1e <sup>7</sup> CFU mL <sup>-1</sup> | >0.9999 | -                                    | -                                    |
| 2e <sup>7</sup> CFU mL <sup>-1</sup> | 0.0205  | 0.0205                               | -                                    |
| 5e <sup>7</sup> CFU mL <sup>-1</sup> | <0.0001 | <0.0001                              | <0.0001                              |

**Table S6.** *p*-values of pairwise comparisons using Log-rank (Mantel-Cox) test of zebrafish survival curves when subjected to LPS extracted from *Ph. damsela* subps. piscicida (LPS PDP) commercial LPS from *P. aeruginosa* (PA-Com), at the described concentrations (µg mL<sup>-1</sup>).

|                                   | Control | LPS PDP 100 µg mL <sup>-1</sup> | LPS PDP 500 µg mL <sup>-1</sup> |
|-----------------------------------|---------|---------------------------------|---------------------------------|
| Control                           | -       | -                               | -                               |
| LPS PDP 100 µg mL <sup>-1</sup>   | >0.9999 | -                               | -                               |
| LPS PDP 500 µg mL <sup>-1</sup>   | 0.3173  | 0.3173                          | -                               |
| LPS PA-Com 45 µg mL <sup>-1</sup> | <0.0001 | <0.0001                         | <0.0001                         |

**Table S7.** *p*-values of pairwise comparisons using Log-rank (Mantel-Cox) test of zebrafish survival curves when subjected to LPS extracted from *T. maritimum* (LPS PDP) and LPS commercially available from *P. aeruginosa* (LPS PA Sigma), at the described concentrations ( $\mu\text{g mL}^{-1}$ ).

|                                     | Control | LPS TM 50<br>$\mu\text{g mL}^{-1}$ | LPS TM<br>100 $\mu\text{g mL}^{-1}$ | LPS TM<br>250 $\mu\text{g mL}^{-1}$ | LPS TM<br>500 $\mu\text{g mL}^{-1}$ |
|-------------------------------------|---------|------------------------------------|-------------------------------------|-------------------------------------|-------------------------------------|
| Control                             | -       | -                                  | -                                   | -                                   | -                                   |
| LPS TM 50 $\mu\text{g mL}^{-1}$     | 0.3173  | -                                  | -                                   | -                                   | -                                   |
| LPS TM 100 $\mu\text{g mL}^{-1}$    | 0.6097  | 0.1573                             | -                                   | -                                   | -                                   |
| LPS TM 250 $\mu\text{g mL}^{-1}$    | 0.9961  | 0.3173                             | 0.6097                              | -                                   | -                                   |
| LPS TM 500 $\mu\text{g mL}^{-1}$    | <0.0001 | <0.0001                            | <0.0001                             | <0.0001                             | -                                   |
| LPS PA-Com 45 $\mu\text{g mL}^{-1}$ | <0.0001 | <0.0001                            | <0.0001                             | <0.0001                             | <0.0001                             |

**Table S8.** *p*-values of pairwise comparisons using Log-rank (Mantel-Cox) test of zebrafish survival curves when subjected to commercial LPS from *P. aeruginosa* (PA-Com), and LPS extracted from *P. aeruginosa* (LPS PA Ext) at the described concentrations ( $\mu\text{g mL}^{-1}$ ).

|                                      | Control | LPS PA-<br>Com 50 $\mu\text{g mL}^{-1}$ | LPS PA-<br>Com 100 $\mu\text{g mL}^{-1}$ | LPS PA Ext<br>50 $\mu\text{g mL}^{-1}$ | LPS PA Ext<br>100 $\mu\text{g mL}^{-1}$ |
|--------------------------------------|---------|-----------------------------------------|------------------------------------------|----------------------------------------|-----------------------------------------|
| Control                              | -       | -                                       | -                                        | -                                      | -                                       |
| LPS PA-Com 50 $\mu\text{g mL}^{-1}$  | <0.0001 | -                                       | -                                        | -                                      | -                                       |
| LPS PA-Com 100 $\mu\text{g mL}^{-1}$ | <0.0001 | <0.0001                                 | -                                        | -                                      | -                                       |
| LPS PA Ext 50 $\mu\text{g mL}^{-1}$  | >0.9999 | <0.0001                                 | <0.0001                                  | -                                      | -                                       |
| LPS PA Ext 100 $\mu\text{g mL}^{-1}$ | 0.1544  | <0.0001                                 | <0.0001                                  | 0.1544                                 | -                                       |
| LPS PA Ext 250 $\mu\text{g mL}^{-1}$ | 0.3173  | <0.0001                                 | <0.0001                                  | 0.3173                                 | 0.5729                                  |
